# Supplementary material for: Nutritional Intervention Contributes to the Improvement of Symptoms Related to Quality of Life in Breast Cancer Patients Undergoing Neoadjuvant Chemotherapy: A Randomized Clinical Trial
Source: PubMed Central journal article supplement (PMC7916763; doi:10.3390/nu13020589), 2021-02-10
Supplement: nutrients-13-00589-s001.pdf [file nutrients-13-00589-s001.pdf]

**Table S1.** Comparison of dietary intake between nutritional intervention and control groups in the first three cycles of neoadjuvant chemotherapy.

| Variables                   | Intervention Group ( <i>n</i> = 19) |                |                | Control Group ( <i>n</i> = 15) |                |                | <i>p</i> <sub>Interaction</sub> | <i>p</i> <sub>time</sub> | <i>p</i> <sub>group</sub> |
|-----------------------------|-------------------------------------|----------------|----------------|--------------------------------|----------------|----------------|---------------------------------|--------------------------|---------------------------|
|                             | T <sub>1</sub>                      | T <sub>2</sub> | T <sub>3</sub> | T <sub>1</sub>                 | T <sub>2</sub> | T <sub>3</sub> |                                 |                          |                           |
| Energy (kcal/day)           | 1603.1 ± 107.9                      | 1575.5 ± 103.4 | 1672.9 ± 96.9  | 1710.0 ± 112.5                 | 1710.7 ± 163.8 | 1742.1 ± 240.1 | 0.917                           | 0.761                    | 0.526                     |
| Carbohydrate (g/day)        | 221.3 ± 13.5                        | 217.0 ± 13.7   | 241.2 ± 22.6   | 219.5 ± 19.3                   | 231.2 ± 19.1   | 224.7 ± 37.1   | 0.512                           | 0.751                    | 0.965                     |
| Protein (g/day)             | 79.2 ± 8.8                          | 71.7 ± 7.0     | 83.7 ± 9.7     | 90.9 ± 8.8                     | 84.1 ± 11.8    | 92.0 ± 12.1    | 0.951                           | 0.457                    | 0.245                     |
| Fat (g/day)                 | 45.0 ± 5.9                          | 42.6 ± 4.2     | 42.7 ± 3.8     | 52.2 ± 5.2                     | 50.5 ± 7.1     | 51.4 ± 7.4     | 0.986                           | 0.934                    | 0.129                     |
| Cholesterol (mg/day)        | 357.3 ± 50.2                        | 325.3 ± 57.5   | 314.5 ± 35.5   | 373.9 ± 52.9                   | 315.3 ± 47.9   | 484.6 ± 71.2   | 0.262                           | 0.382                    | 0.244                     |
| Saturated fat (g/day)       | 16.3 ± 2.9                          | 15.0 ± 1.4     | 13.9 ± 1.6     | 17.2 ± 2.1                     | 16.0 ± 2.4     | 17.5 ± 3.6     | 0.701                           | 0.862                    | 0.422                     |
| Monounsaturated fat (g/day) | 14.4 ± 2.3                          | 13.0 ± 1.8     | 12.4 ± 1.4     | 17.2 ± 2.2                     | 15.9 ± 2.6     | 15.8 ± 2.1     | 0.967                           | 0.639                    | 0.099                     |
| Polyunsaturated fat (g/day) | 7.3 ± 0.8                           | 7.0 ± 0.8      | 8.2 ± 1.2      | 8.8 ± 1.0                      | 10.8 ± 1.6     | 10.0 ± 1.7     | 0.506                           | 0.653                    | 0.376                     |
| Fiber (g/day)               | 23.4 ± 2.4                          | 21.5 ± 1.8     | 21.9 ± 2.5     | 20.3 ± 2.8                     | 23.7 ± 3.6     | 20.6 ± 2.8     | 0.407                           | 0.781                    | 0.804                     |
| Sodium (mg/day)             | 1557.6 ± 209.0                      | 1709.5 ± 216.3 | 1587.6 ± 176.6 | 2085.4 ± 420.9                 | 1873.2 ± 268.5 | 2138.4 ± 481.0 | 0.614                           | 0.977                    | 0.140                     |
| Potassium (mg/day)          | 3026.0 ± 325.1                      | 2920.3 ± 243.0 | 2997.7 ± 355.6 | 2743.1 ± 338.8                 | 3097.3 ± 366.5 | 2684.5 ± 323.1 | 0.403                           | 0.690                    | 0.714                     |
| Zinc (mg/day)               | 8.9 ± 1.0                           | 8.1 ± 1.2      | 8.1 ± 0.9      | 9.8 ± 1.3                      | 9.6 ± 1.3      | 8.8 ± 1.3      | 0.903                           | 0.711                    | 0.360                     |
| Selenium (mg/day)           | 68.3 ± 10.5                         | 73.4 ± 10.7    | 79.9 ± 21.3    | 76.6 ± 13.9                    | 65.9 ± 12.0    | 98.4 ± 14.8    | 0.698                           | 0.461                    | 0.633                     |
| Piridoxina (mg/day)         | 1.6 ± 0.2                           | 1.5 ± 0.2      | 1.2 ± 0.1      | 1.4 ± 0.2                      | 1.6 ± 0.2      | 1.6 ± 0.3      | 0.272                           | 0.648                    | 0.761                     |

Data presented in mean ± standard deviation. T1, regarding the end of the first chemotherapy cycle; T2, regarding the end of the second chemotherapy cycle; T3, regarding the end of the third cycle of chemotherapy.
